# Supplementary material
Source: HighWire-hosted journal article supplement (https://svn.smart01.highwire.org/content/6/3/352)
Supplement: inline-supplementary-material-1 [file inline-supplementary-material-1.pdf]

## SUPPLEMENTAL MATERIAL

**Table S1.** Baseline characteristics of the included and excluded patients

| Variable                              | Included<br>n=1996 | Excluded<br>n=612 | P      |
|---------------------------------------|--------------------|-------------------|--------|
| Age, y                                | 62.7±10.9          | 62.0±11.8         | 0.290  |
| Female, n (%)                         | 656 (32.9)         | 189 (30.9)        | 0.359  |
| Smoker, n (%)                         | 860 (43.1)         | 264 (43.3)        | 0.948  |
| Drinker, n (%)                        | 745 (37.4)         | 230 (37.7)        | 0.125  |
| NIHSS on admission, median (IQR)      | 2 (1, 4)           | 2 (1, 4)          | 0.843  |
| Medical history, n (%)                |                    |                   |        |
| Stroke                                | 469 (23.5)         | 149 (24.4)        | 0.666  |
| Hypertension                          | 1403 (70.3)        | 434 (70.9)        | 0.767  |
| Diabetes mellitus                     | 433 (21.7)         | 135 (22.1)        | 0.848  |
| Dyslipidemia                          | 209 (10.5)         | 56 (9.2)          | 0.344  |
| Coronary heart disease                | 214 (10.7)         | 77 (12.6)         | 0.201  |
| Ischemic stroke classification, n (%) |                    |                   |        |
| Large-artery atherosclerosis          | 1008 (57.8)        | 350 (62.9)        | <0.001 |
| Cardioembolism                        | 55 (3.2)           | 34 (5.6)          |        |
| Small-artery occlusion                | 628 (36.0)         | 148 (26.6)        |        |
| Other                                 | 52 (3.0)           | 24 (4.3)          |        |
| History of Medication, n (%)          |                    |                   |        |
| Antiplatelet therapy                  | 409 (20.5)         | 135 (22.1)        | 0.686  |
| Statin therapy                        | 201 (10.1)         | 75 (12.3)         | 0.299  |
| Antihypertension therapy              | 1087 (54.5)        | 329 (53.8)        | 0.882  |
| Medication at discharge, n (%)        |                    |                   |        |
| Antiplatelet therapy                  | 1868 (93.6)        | 566 (92.5)        | 0.339  |
| Statin therapy                        | 1670 (83.7)        | 526 (85.9)        | 0.176  |
| Antihypertension therapy              | 1334 (66.8)        | 397 (64.9)        | 0.368  |

IS: ischemic stroke; NIHSS: National Institute of Health stroke scale; IQR: interquartile range

## S.2 Profiles Grouping Methods

### S.2.1 Preprocessing of ABP data

We focused on one 24-hour cycle SBP measurement, which starts from 10:00 am to 10:00 am the next day. Furthermore, to align the SBP measurements across the observations, we construct a 15 minutes spaced grid  $t_1 \cdots t_T$  on the time axis, where the 15 minutes gap was selected because the SBP measurements were taken roughly every 15 minutes during the day. We took the average of the measurements within the  $j$ th grid cell to represent the SBP level at time  $t_j$ .

Let  $X_i(t_j)$  be the independent identically distributed SBP measurement at time  $t_j$ ,  $i = 1, \dots, n$ . Because of the irregular measurement times, patients may have missing measurements in some intervals. To indicate the missing measurement, we define  $R_{ij} = 1$  if the patient  $i$  measures his/her blood pressure at  $t_j$ ,  $R_{ij} = 0$  otherwise. This missing mechanism is not disease relevant so that the missing at random assumption is appropriate in our study.

### S.2.2 Functional clustering algorithms

Let  $C_i$  denote the classification of individual  $i$  and  $C = (C_1, \dots, C_n)'$ , we model

$$X_i(t) = \sum_{c=1}^M I(C_i = c) \mu_c(t) + f_i(t) + \epsilon_i, \text{ where } \mu_c(t) = E\{X_i(t) | C_i = c\} \text{ is the mean}$$

function for the class  $c$ ,  $c = 1, \dots, M$ , and  $\epsilon_i$  is the mean 0 random error,  $f_i$  is an unknown function which describes the within class fluctuation for the patient  $i$ . We approximate  $f_i(t)$  in the form of  $P(t)'\beta_i$ , where  $P$  represents the  $d$  dimensional Fourier basis. We then estimate  $\beta_i$ ,  $\mu_c(t)$  by minimizing the following sum of

$$\text{squared error (SSE), } \sum_{i=1}^n \sum_{j=1}^T R_{ij} I(C_i = c) \{X_i(t_j) - \mu_c(t_j) - P^T(t_j)\beta_i\}^2, \text{ for a given cluster}$$

membership  $C$ , where  $\gamma = (\gamma'_1, \dots, \gamma'_n)'$ .

When the cluster membership  $C$  is unknown, we implement the iterative clustering method of Chiou and Li<sup>1</sup>. Essentially, we iteratively minimize the SSE, alternating with respect to the cluster membership  $C$ , and the model parameters  $\mu$  and  $\sigma$ . It is worth mentioning that this clustering method does not require regularly distributed measurement times, because it automatically handles cases with missing measurements. An R implementation of the clustering algorithm is available as the *funcy* package on CRAN.

## REFERENCES

1. Chiou JM LP. Functional clustering and identifying substructures of longitudinal data. *Journal of the Royal Statistical Society*. 2007;69:679-699
